# Supplementary material
Source: MDPI journal article supplement (https://www.mdpi.com/1424-8247/16/7/1015)
Supplement: s1 [file s1]

## Supplementary Materials

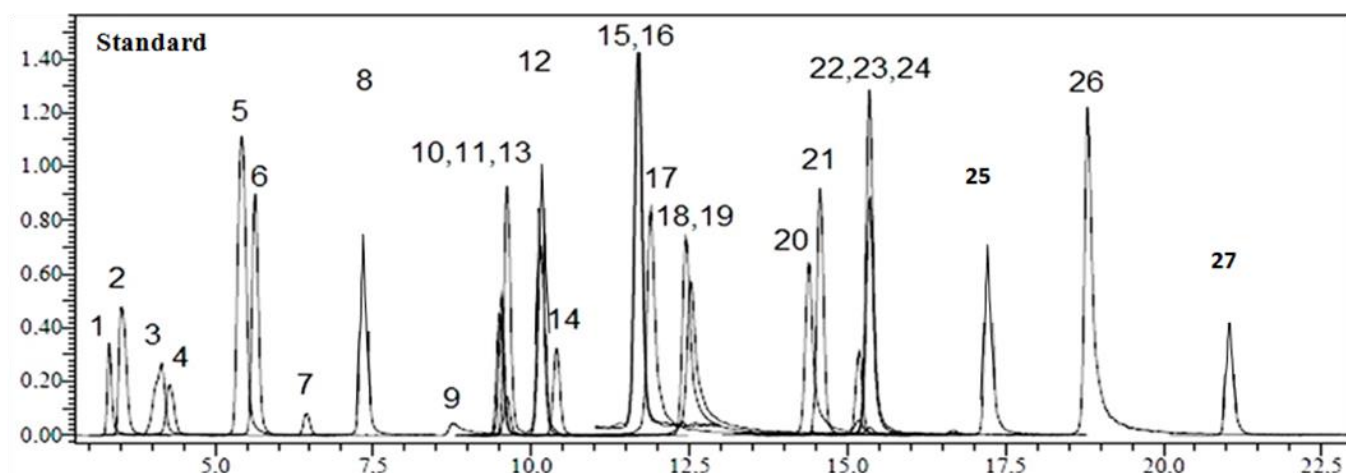

**Figure S1.** LC-MS/MS chromatograms of 250 ppb standard mix. Notes: Chromatographic conditions were given in experimental section. Standard compounds: 1: quinic acid, 2: malic acid, 3: tr-aconitic acid, 4: gallic acid, 5: chlorogenic acid, 6: protocatechuic acid, 7: tannic acid, 8: tr-caffeic acid, 9: vanillin, 10: *p*-coumaric acid, 11: rosmarinic acid, 12: rutin, 13: hesperidin, 14: hyperoside, 15: 4-OH benzoic acid, 16: salicylic acid, 17: myricetin, 18: fisetin, 19: coumarin, 20: quercetin, 21: naringenin, 22: hesperetin, 23: luteolin, 24: kaempferol, 25: apigenin, 26: rhamnetin, 27: chrysin.

**Table S1.** Analytical parameters of LC-MS/MS method

| Analyte                    | RT    | R <sup>2</sup> | RSD%   | Linearity Range (mg/L) | LOD/LOQ (μg/L) | Recovery (%) |
|----------------------------|-------|----------------|--------|------------------------|----------------|--------------|
| 1 Quinic acid              | 3.32  | 0.9927         | 0.0388 | 250–10,000             | 22.3/74.5      | 103.3        |
| 2 Malic acid               | 3.54  | 0.9975         | 0.1214 | 250–10,000             | 19.2/64.1      | 101.4        |
| 3 tr-Aconitic acid         | 4.13  | 0.9933         | 0.3908 | 250–10,000             | 15.6/51.9      | 102.8        |
| 4 Gallic acid              | 4.29  | 0.9901         | 0.4734 | 25–1000                | 4.8/15.9       | 102.3        |
| 5 Chlorogenic acid         | 5.43  | 0.9932         | 0.1882 | 250–10,000             | 7.3/24.3       | 99.7         |
| 6 Protocatechuic acid      | 5.63  | 0.9991         | 0.5958 | 100–4000               | 25.8/85.9      | 100.2        |
| 7 Tannic acid              | 6.46  | 0.9955         | 0.9075 | 100–4000               | 10.2/34.2      | 97.8         |
| 8 tr-Caffeic acid          | 7.37  | 0.9942         | 1.0080 | 25–1000                | 4.4/14.7       | 98.6         |
| 9 Vanillin                 | 8.77  | 0.9995         | 0.4094 | 250–10,000             | 10.1/33.7      | 99.2         |
| 10 <i>p</i> -Coumaric acid | 9.53  | 0.9909         | 1.1358 | 100–4000               | 15.2/50.8      | 98.4         |
| 11 Rosmarinic acid         | 9.57  | 0.9992         | 0.5220 | 250–10,000             | 10.4/34.8      | 101.7        |
| 12 Rutin                   | 10.18 | 0.9971         | 0.8146 | 250–10,000             | 17.0/56.6      | 102.2        |
| 13 Hesperidin              | 9.69  | 0.9973         | 0.1363 | 250–10,000             | 21.6/71.9      | 100.2        |
| 14 Hyperoside              | 10.43 | 0.9949         | 0.2135 | 100–4000               | 12.4/41.4      | 98.5         |
| 15 4-OH Benzoic acid       | 11.72 | 0.9925         | 1.4013 | 25–1000                | 3.0/10.0       | 106.2        |
| 16 Salicylic acid          | 11.72 | 0.9904         | 0.6619 | 25–1000                | 4/13.3         | 106.2        |
| 17 Myricetin               | 11.94 | 0.9991         | 2.8247 | 100–4000               | 9.9/32.9       | 106.0        |
| 18 Fisetin                 | 12.61 | 0.9988         | 2.4262 | 100–4000               | 10.7/35.6      | 96.9         |
| 19 Coumarin                | 12.52 | 0.9924         | 0.4203 | 100–4000               | 9.1/30.4       | 104.4        |
| 20 Quercetin               | 14.48 | 0.9995         | 4.3149 | 25–1000                | 2.0/6.8        | 98.9         |
| 21 Naringenin              | 14.66 | 0.9956         | 2.0200 | 25–1000                | 2.6/8.8        | 97.0         |

|    |            |       |        |        |         |           |       |     |
|----|------------|-------|--------|--------|---------|-----------|-------|-----|
| 22 | Hesperetin | 15.29 | 0.9961 | 1.0164 | 25–1000 | 3.3/11.0  | 102.4 | 5.3 |
| 23 | Luteolin   | 15.43 | 0.9992 | 3.9487 | 25–1000 | 5.8/19.4  | 105.4 | 6.9 |
| 24 | Kaempferol | 15.43 | 0.9917 | 0.5885 | 25–1000 | 2.0/6.6   | 99.1  | 5.2 |
| 25 | Apigenin   | 17.31 | 0.9954 | 0.6782 | 25–1000 | 0.1/0.3   | 98.9  | 5.3 |
| 26 | Rhamnetin  | 18.94 | 0.9994 | 2.5678 | 25–1000 | 0.2/0.7   | 100.8 | 6.1 |
| 27 | Chrysin    | 21.18 | 0.9965 | 1.5530 | 25–1000 | 0.05/0.17 | 102.2 | 5.3 |

Parent ion ( $m/z$ ): Molecular ions of the standard compounds (mass to charge ratio); MS<sup>2</sup> (CE): MRM fragments for the related molecular ions (CE refers to related collision energies of the fragment ions); RT: Retention time; R<sup>2</sup>: coefficient of determination; RSD: relative standard deviation; LOD/LOQ (μg/L): Limit of detection/Limit of quantification.

**Table S2.** Drug-likeness characteristics of the acarbose and the top active ligands of *H. albus*

|           | MW<br>g/mol | logP  | Log S | HBA | HBD | TPSA (Å <sup>2</sup> ) | AMR    | nRB | Lipinski | Ghose | Veber | Egan |
|-----------|-------------|-------|-------|-----|-----|------------------------|--------|-----|----------|-------|-------|------|
| Acarbose  | 645.60      | -6.22 | 2.13  | 19  | 14  | 321.17                 | 136.69 | 9   | No       | No    | No    | No   |
| Luteolin  | 286.24      | 1.73  | -3.71 | 6   | 4   | 111.13                 | 76.01  | 1   | Yes      | Yes   | Yes   | Yes  |
| Fisetin   | 286.24      | 1.55  | -3.35 | 6   | 4   | 111.13                 | 76.01  | 1   | Yes      | Yes   | Yes   | Yes  |
| Rutin     | 610.52      | -1.29 | -3.30 | 16  | 10  | 269.43                 | 141.38 | 6   | No       | No    | No    | No   |
| Quercetin | 302.24      | 1.23  | -3.16 | 7   | 5   | 131.36                 | 78.03  | 1   | Yes      | Yes   | Yes   | Yes  |

AMR: Atom Molar Refractivity; nRB; Num. rotatable bonds; HBD: Num. H-bond donors; HBA: Num. H-bond acceptors.

**Table S3.** ADMET properties of the acarbose and the top active ligands of *H. albus*

|              | Criteria             | Acarbose | Luteolin | Fisetin | Rutin | Quercetin |
|--------------|----------------------|----------|----------|---------|-------|-----------|
| Absorption   | BBB penetration      | N        | N        | N       | N     | N         |
| Distribution | Caco2                | L        | H        | H       | L     | L         |
|              | HIA                  | L        | H        | H       | L     | H         |
| Metabolism   | CYP1A2 inhibitor     | N        | Y        | Y       | N     | Y         |
|              | CYP2C19 inhibitor    | N        | N        | N       | N     | N         |
|              | CYP2C9 inhibitor     | N        | N        | N       | N     | N         |
|              | CYP2D6 inhibitor     | N        | Y        | Y       | N     | Y         |
|              | CYP3A4 inhibitor     | N        | Y        | Y       | N     | Y         |
| Excretion    | Cl                   | L        | M        | M       | L     | M         |
| Toxicity     | hERGBlockers         | N        | N        | N       | N     | N         |
|              | AMES Toxicity        | N        | Y        | Y       | N     | Y         |
|              | Skin Sensitization   | N        | Y        | Y       | N     | Y         |
|              | Carcinogenicity      | N        | N        | N       | N     | Y         |
|              | Cytotoxicity         | N        | N        | N       | N     | N         |
|              | Immunotoxicity       | N        | N        | N       | Y     | N         |
|              | H-HT                 | Y        | N        | N       | N     | N         |
|              | Eye Corrosion        | N        | N        | N       | N     | N         |
|              | Respiratory toxicity | N        | N        | N       | N     | N         |
|              | NR-AR                | N        | N        | N       | N     | N         |
|              | NR-ER                | Y        | Y        | Y       | N     | Y         |
|              | SR-p53               | N        | N        | N       | N     | N         |

BBB, Blood-Brain Barrier. HIA, Human Intestinal Absorption. Caco2, Permeability assay. hERG, human Ether-a-go-go-Related Gene potassium channel. H-HT, Human Hepatotoxicity. NR-AR, Androgen receptor disruptor. NR-ER, Estrogen receptor disruptor. SR-p53, tumor suppressor protein p53 activator. Cl, clearance of the molecule. N: inactive. Y: active. L: Low. M: Moderate. H: High.
